# Supplementary material for: Introduction of apple ANR genes into tobacco inhibits expression of both CHI and DFR genes in flowers, leading to loss of anthocyanin
Source: PubMed Central journal article supplement — J Exp Bot. 2012 Jan 11;63(7):2437–47. doi: 10.1093/jxb/err415 (PMC3346214; doi:10.1093/jxb/err415), 2012-01-11
Supplement: supp_err415_00071803-file001.pdf [file supp_err415_00071803-file001.pdf]

## Supplementary Materials

**Table S1. Primer sequences for qRT-PCR**

| <b>Genus</b>     | <b>Gene</b>    | <b>Gene identifier</b> | <b>Forward primer</b>   | <b>Reverse primer</b>    |
|------------------|----------------|------------------------|-------------------------|--------------------------|
| <i>Malus</i>     | <i>MdANR1</i>  |                        | TTGGAGATTTCCGTCTGAGG    | TTCTCATCAGAAAGCAACACGC   |
|                  | <i>MdANR2</i>  |                        | TTGCTGTGCTGCCAACACCA    | TTCTCATCAGAAAGCAACAAGAAG |
|                  | <i>MdCHS</i>   | X68977                 | TCAAGCCTATTGGGATTTTCG   | CAGTGACTTCCTCCTCACC      |
|                  | <i>MdCHI</i>   | X68978                 | GATATCGAAGCCGAAAATGA    | TGTTGACTCACGCCAACAAAT    |
|                  | <i>MdF3H</i>   | AF117270               | ACACCAAATATGGCTCCTGC    | TTTCGTTGCTGAAGTCGTTG     |
|                  | <i>MdFLS</i>   | AF119095               | AATGGGAGTGGAGTCTGTGG    | AGTTGGAGCTGGCCTCAGTA     |
|                  | <i>MdDFR</i>   | AF117268               | AAGGCCGTTACATTTGTTCG    | GCCCTTGAACTTTGTGGGTA     |
|                  | <i>MdUFGT</i>  | AF117267               | AGCTCCACTCGGAACCTCAA    | AACCCGCCCTAAATATGTCC     |
|                  | <i>MdANS</i>   | AF117269               | CAATTTGGCCTCAAACACCT    | TCAACACCAAGTGCAAGCTC     |
|                  | <i>MdANR</i>   | DQ099803               | GTTGCAACCCCTGTCAACTT    | CACGACCAAACCTGTTCCCTT    |
|                  | <i>MdLAR1</i>  | DQ139836.1             | ACAACACCCACCCCTTCTGAG   | TGCAGCAAGGGCTAGTAGGT     |
|                  | <i>MdActin</i> | DQ822466               | CTACAAAGTCATCGTCCAGACAT | TGGGATGACATGGAGAAGATT    |
| <i>Nicotiana</i> | <i>NbActin</i> | AY179605               | AATGATCGGAATGGAAGCTG    | TGGTACCACCACTGAGGACA     |
|                  | <i>NtCHI</i>   | AB213651               | GAAATCCTCCGATCCAGTGA    | CAACGTTGACAACATCAGGC     |
|                  | <i>NbCHS</i>   | EF421432               | AGAAAAGCCTTGTGGAAGCA    | ACTTGGTCCAAAATTGCAGG     |
|                  | <i>NtF3H</i>   | AB289450.1             | ACAGGGTGAAGTGGTCCAAG    | CCTTGGTTAAGGCCTCCTTC     |
|                  | <i>NtF3'H</i>  | AB289449.1             | TCCAAGAATACTGGCCCAAG    | CTCACAACCTCGGATGCAA      |
|                  | <i>NtFLS</i>   | AB289451               | GAACTTGAAGGGAAAAGGGG    | TCCTGTAGGAGGGAGGATT      |
|                  | <i>NbDFR</i>   | EF421431               | TCCCATCATGCGATCATCTA    | ATGGCTTCTTTGTACAGTCC     |
|                  | <i>NtLAR</i>   | AM827419.1             | TCAAGGTCCTTTACGCCATC    | ACGAACCTGCTTCTCTTTGG     |
|                  | <i>NtANS</i>   | AB289447               | TGGCGTTGAAGCTCATACTG    | TTTCAAGGGTGTCCCAATA      |
|                  | <i>NtUFGT</i>  | FG627024.1             | GAGTGCATTGGATGCCTTTT    | CCAGTCCATTAGGTCCTTG      |
|                  | <i>NtANR1</i>  | AM791704.1             | CATTTGACTTTCCCAAACGC    | ATTGGGCTTTTGAGTTGTGC     |
|                  | <i>NtANR2</i>  | DW003895.1             | TGTTCCCACTGGGATGATA     | TGCACCTATACTCTGTTAGTGGC  |
|                  | <i>NtAN2</i>   | FJ472647               | AGGAGAGCAAGCAAAAAGCA    | TGAATTCATCATCCGTCAA      |
|                  | <i>NtTT1</i>   | FG164336               | ATGCAATACCAAAGCTTGCC    | CAACATCAACCATCCACGAG     |
|                  | <i>NtTT2</i>   | EB425500               | CCTACCCTTGGTACGCAAAA    | TGGTTTTGTTGGTCATGAGG     |

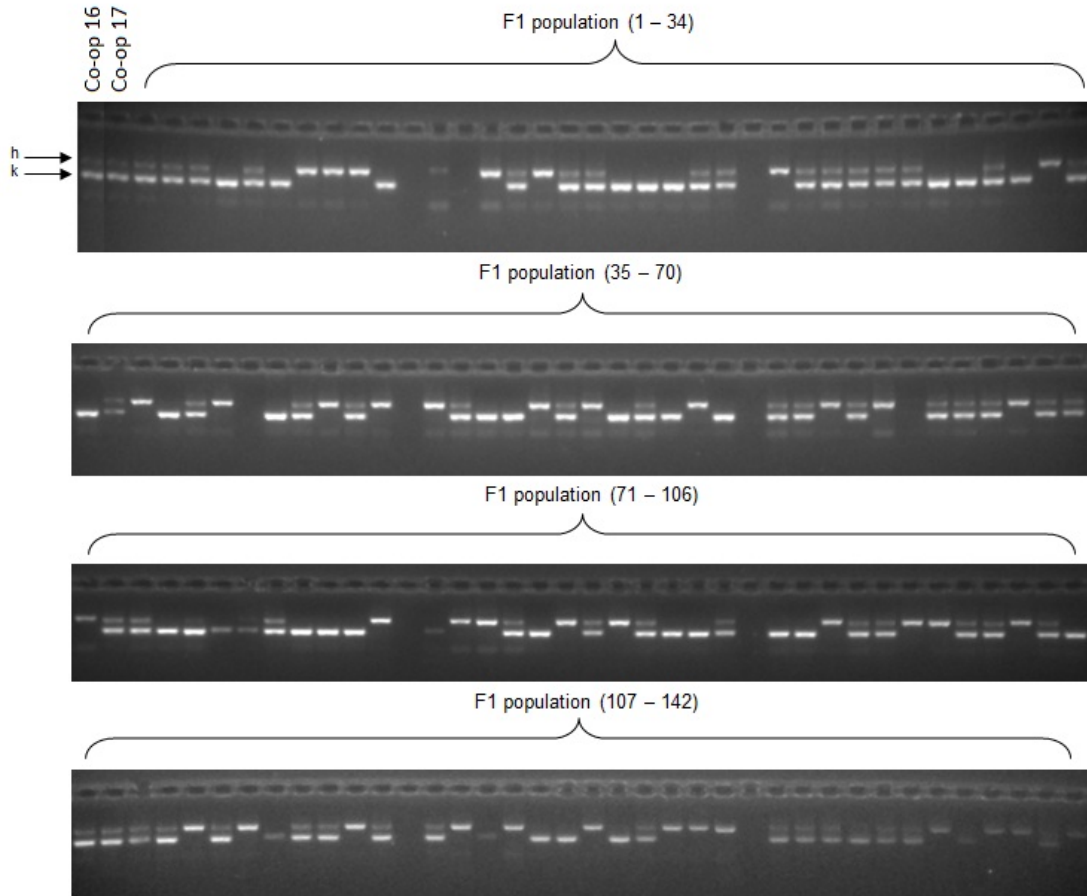

Fig. S1. Segregation for the *MdANR1* gene in an F1 apple population. The two parents (Co-op 16 and Co-op 17) and 142 individuals of 'Co-op 16' x 'Co-op 17' F1 population were screened using an *MdANR1*-indel marker. The arrows indicate segregated DNA bands where 'h' represents the upper band and 'k' represents the lower band.

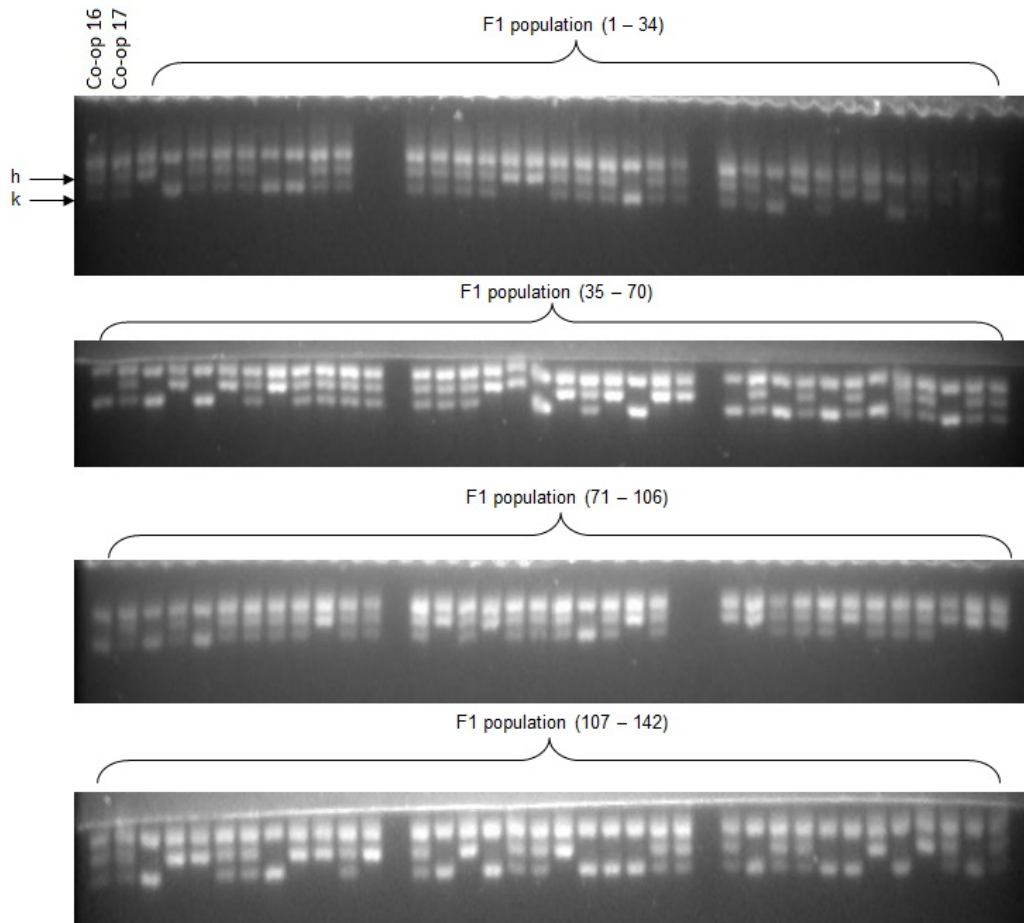

Fig. S2. Segregation for the *MdANR2* gene in an F<sub>1</sub> apple population. The two parents (Co-op 16 and Co-op 17) and 142 individuals of 'Co-op 16' x 'Co-op 17' F<sub>1</sub> population were screened using an *MdANR2*-indel marker. The arrows indicated the segregated DNA bands where 'h' represented the upper band and 'k' represented the lower band.

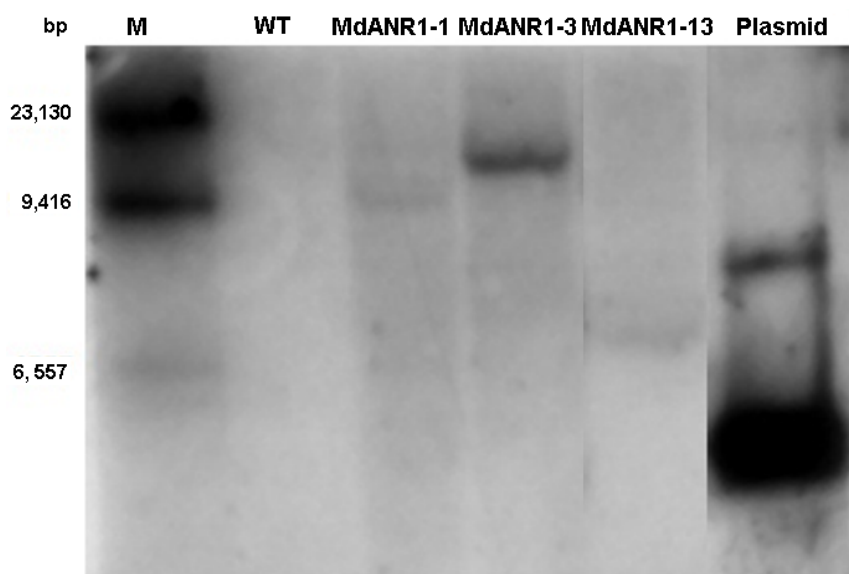

Fig. S3. Copy numbers of *MdANR1* genes in transgenic tobacco lines determined by Southern blot hybridization. The DIG marker II was used as a DNA marker (M). Genomic DNA of wild-type (WT) tobacco and MdANR-pBI121 (plasmid) served as negative and positive controls, respectively.
